# Supplementary material for: Spinel-structure catalyst catalyzing CO2 hydrogenation to full spectrum alkenes with an ultra-high yield
Source: Royal Society of Chemistry journal article supplement (doi:10.1039/d0cc03426f), 2020-01-01
Supplement: d0cc03426f1.pdf [file d0cc03426f1.pdf]

## Supporting information file for

### **Spinel-structure catalyst catalyzing CO<sub>2</sub> hydrogenation to full spectrum alkenes with an ultra-high yield**

Lisheng Guo <sup>1</sup>, Jie Li <sup>2</sup>, Yu Cui <sup>1</sup>, Rungtiwa Kosol <sup>1</sup>, Yan Zeng <sup>1</sup>, Guangbo Liu <sup>3</sup>, Jinhu Wu <sup>3</sup>, Tiansheng Zhao <sup>4</sup>, Guohui Yang <sup>1</sup>, Lishu Shao <sup>5</sup>, Peng Zhan <sup>5</sup>, Jienan Chen <sup>5\*</sup>, Noritatsu Tsubaki <sup>1\*</sup>

<sup>1</sup> Department of Applied Chemistry, School of Engineering, University of Toyama, Gofuku 3190, Toyama 930-8555, Japan

<sup>2</sup> School of Chemistry and Chemical Engineering, Yangzhou University, Yangzhou 225002, China

<sup>3</sup> Qingdao Institute of Bioenergy and Bioprocess, Chinese Academy of Sciences, Qingdao, 266101, China

<sup>4</sup> State Key Laboratory Cultivation Base of Natural Gas Conversion, Ningxia University, Yinchuan, 750021, China

<sup>5</sup> Ministry of Forestry Bioethanol Research Center, Central South University of Forestry and Technology, Changsha, 410004, China

Corresponding authors: chenjnx@163.com; tsubaki@eng.u-toyama.ac.jp

Total number of Pages: 20 (S1-S20)

Total number of Figures: 12 (Figure S1-Figure S12)

Total number of Tables: 5 (Table S1-Table S5)

**Table S1.** Catalytic performance of CO<sub>2</sub> hydrogenation over different catalysts.

**Table S2.** Catalytic performance of CO<sub>2</sub> hydrogenation over different catalysts.

**Table S3.** Surface area of different iron-based catalysts.

**Table S4.** Catalytic performance of CO<sub>2</sub> hydrogenation over a multi-stage reactor system.

**Table S5.** Catalytic performance of CO<sub>2</sub> hydrogenation over different catalysts.

**Fig. S1.** Product distribution from different spent iron-based catalysts. (a, Na-ZnFe<sub>2</sub>O<sub>4</sub>; b, K-ZnFe<sub>2</sub>O<sub>4</sub>; c, K-Zn(FeCo)<sub>2</sub>O<sub>4</sub>)

**Fig. S2.** TG profiles of different iron-based catalysts after 36h reaction. (a, Na-ZnFe<sub>2</sub>O<sub>4</sub>; b, K-ZnFe<sub>2</sub>O<sub>4</sub>; c, K-Zn(FeCo)<sub>2</sub>O<sub>4</sub>)

**Fig. S3.** Typical SEM images of different as-prepared iron-based catalysts. (a, Fe<sub>2</sub>O<sub>3</sub>; b, ZnFe<sub>2</sub>O<sub>4</sub>; c, Na-ZnFe<sub>2</sub>O<sub>4</sub>; d, K-ZnFe<sub>2</sub>O<sub>4</sub>; e, K-Zn(FeCo)<sub>2</sub>O<sub>4</sub>)

**Fig. S4.** Special SEM images and corresponding element composition mapping of different spinel-like catalysts. (a, ZnFe<sub>2</sub>O<sub>4</sub>; b, Na-ZnFe<sub>2</sub>O<sub>4</sub>; c, K-ZnFe<sub>2</sub>O<sub>4</sub>; d, K-Zn(FeCo)<sub>2</sub>O<sub>4</sub>)

**Fig. S5.** N<sub>2</sub> adsorption-desorption isotherms of different iron-based catalysts.

**Fig. S6.** Typical TEM images of different spent catalysts. (a, Fe<sub>2</sub>O<sub>3</sub>; b, ZnFe<sub>2</sub>O<sub>4</sub>; c, Na-ZnFe<sub>2</sub>O<sub>4</sub>; d, Na-ZnFe<sub>2</sub>O<sub>4</sub>; e, K-Zn(FeCo)<sub>2</sub>O<sub>4</sub>; besides, the stand bars in the pictures stand for 10 nm)

**Fig. S7.** Typical TEM images of spent K-Zn(FeCo)<sub>2</sub>O<sub>4</sub>.

**Fig. S8.** XRD patterns of fresh (a) and spent (b) catalysts. (A, Fe<sub>2</sub>O<sub>3</sub>; B, ZnFe<sub>2</sub>O<sub>4</sub>; C, Na-ZnFe<sub>2</sub>O<sub>4</sub>; D, K-ZnFe<sub>2</sub>O<sub>4</sub>; E, K-Zn(FeCo)<sub>2</sub>O<sub>4</sub>)

**Fig. S9.** HR-TEM images of spent Fe<sub>2</sub>O<sub>3</sub> catalysts.

**Fig. S10.** H<sub>2</sub>-TPR curves of different catalysts.

**Fig. S11.** CO<sub>2</sub>-TPD curves of different catalysts.

**Fig. S12.** CO<sub>2</sub>-TPD curves normalized by relative surface area content of different catalysts.

## Catalyst preparation

All spinel-like catalysts were fabricated through solvent-thermal synthesis. In brief, iron (III) nitrate nonahydrate of 2.02 g and zinc nitrate hexahydrate of 0.74 g (Zn/Fe=1:2 molar ratio) were dissolved in distilled water (40 mL), and NaOH (0.1 mol) was added to the mixtures to ensure that it was basic. The solution was transferred to a 100 mL Teflon tube being set in a stainless autoclave, which was then placed in oven for 8 h at 180 °C for the synthesis reaction. After the sample cooled to ambient temperature, it was washed with distilled water (0.5L) to control the amount of residual Na, denoted as Na-ZnFe<sub>2</sub>O<sub>4</sub>. If KOH replaces NaOH, another catalyst can be obtained by the same procedures, labeled as K-ZnFe<sub>2</sub>O<sub>4</sub>. When NaOH or KOH was replaced by NH<sub>3</sub>·H<sub>2</sub>O, the corresponding catalysts was marked as ZnFe<sub>2</sub>O<sub>4</sub> to compare with the catalytic performance derived from promoter modified one. Different from K-ZnFe<sub>2</sub>O<sub>4</sub> preparation process, iron (III) nitrate nonahydrate of 1.616 g, cobaltous nitrate hexahydrate of 0.291 g, and zinc nitrate hexahydrate of 0.74 g (Zn/(Fe+Co) = 1:2 molar ratio, Fe/Co = 4:1 molar ratio) were dissolved in distilled water (40 mL), and KOH (0.1 mol) was used. Following the same procedures, the resulting catalyst was labeled as K-Zn(FeCo)<sub>2</sub>O<sub>4</sub>. Besides, the reference catalyst (Fe<sub>2</sub>O<sub>3</sub>) was also prepared through solvent-thermal synthesis method, in which NH<sub>3</sub>·H<sub>2</sub>O was adopted to eliminate the effects of promoter. To clarify the beneficial ZnFe<sub>2</sub>O<sub>4</sub> structure, ZnO+Fe<sub>2</sub>O<sub>3</sub> catalyst was also fabricated. Briefly, same mole of ZnO and Fe<sub>2</sub>O<sub>3</sub> was physically mixed to form a catalyst with the same composition as the spinel structure (ZnFe<sub>2</sub>O<sub>4</sub>), marked as ZnO+Fe<sub>2</sub>O<sub>3</sub> catalyst.

## Catalyst characterization

Powder X-ray diffraction (XRD) of the catalysts was recorded on a Rigaku RINT 2400 X-ray diffractometer using Cu K $\alpha$  irradiation at 40 kV and 40 mA. Patterns were collected in the 2 $\theta$  range of 5–90° with a scanning step length of 0.02 deg/s. The X-ray photoelectron spectroscopy (XPS) analysis was conducted on Thermo Fisher Scientific ESCALAB 250Xi multifunctional X-ray photoelectron spectroscope with pretreatment chamber. The temperature-programmed desorption (CO<sub>2</sub>-TPD) and temperature-programmed reduction (H<sub>2</sub>-TPR) of the as-prepared catalysts were characterized over a BELCAT-II-T-SP Characterization System. Scanning electron microscopy (SEM) images and element mapping were carried out on a JEOL JSM-6360LV microscope equipped with energy dispersive spectrometer (EDS). The accelerating voltage was 10 kV. High-resolution transmission electron microscopy (HRTEM) for spent catalysts was obtained using a TOPCON EM-002B at 120 kV. N<sub>2</sub> physisorption was performed on a Micromeritics analyzer. Before sample analysis, the catalysts (50 mg) were vacuum-dried at 200 °C for 6 h. Shimadzu DTG-60 for thermal gravity analysis (TGA) was used to measure weight changes of spent catalysts when heated under a O<sub>2</sub>/N<sub>2</sub> flow (21 vol %/79 vol %, 30 ml min<sup>-1</sup>) at a constant heating rate of 5 °C min<sup>-1</sup>.

## Catalyst reaction

CO<sub>2</sub> hydrogenation processes over as-prepared catalysts were measured in a fixed-bed stainless steel reactor (6.0 mm inner diameter). First, the as-prepared catalysts (0.5 g) were *in situ* reduced at 400 °C for 10 h in a pure H<sub>2</sub> flow (40 mL min<sup>-1</sup>). Subsequently, the temperature was dropped to certain reaction temperature. After that, the reactant gas of CO<sub>2</sub>/H<sub>2</sub>/Ar (27.1 vol %/67.6 vol %/5.3 vol %) was fed into the reactor, and the pressure increased to 2.0 MPa. N-octane in ice-trap as solvent could catch and collect the liquid hydrocarbons from the effluents. After reaction finished, the obtained liquid hydrocarbons were analyzed by an off-line gas chromatograph using a flame ionization detector. CO<sub>2</sub> conversion, CO selectivity, and hydrocarbons selectivity were calculated according to equation 1, 2, and 3, respectively.

$$\text{CO}_2 \text{ conversion (\%)} = \frac{\text{CO}_2 \text{ in} - \text{CO}_2 \text{ out}}{\text{CO}_2 \text{ in}} \times 100\% \quad (1)$$

CO<sub>2</sub> in: mole fraction of CO<sub>2</sub> in the inlet, CO<sub>2</sub> out: mole fraction of CO<sub>2</sub> in the outlet.

$$\text{CO selectivity (\%)} = \frac{\text{CO out}}{\text{CO}_2 \text{ in} - \text{CO}_2 \text{ out}} \times 100\% \quad (2)$$

CO out: mole fraction of CO in the outlet.

$$C_i \text{ hydrocarbon selectivity (C-mol \%)} = \frac{\text{Mole of } C_i \text{ hydrocarbons} \times i}{\sum_{i=1}^n \text{Mole of } C_i \text{ hydrocarbons} \times i} \times 100\% \quad (3)$$

**Table S1.** Catalytic performance of CO<sub>2</sub> hydrogenation over different catalysts. <sup>a</sup>

| Catalysts                              | CO <sub>2</sub> Conv. (%) | CO Sel. (%) | Selectivity (mol-%) |                  |                 | Alkenes Sel. (%) <sup>b</sup> | O/(O+P) <sup>c</sup><br>(%) |
|----------------------------------------|---------------------------|-------------|---------------------|------------------|-----------------|-------------------------------|-----------------------------|
|                                        |                           |             | CH <sub>4</sub>     | C <sub>2-4</sub> | C <sub>5+</sub> |                               |                             |
| Fe <sub>2</sub> O <sub>3</sub>         | 32.8                      | 6.3         | 42.7                | 48.5             | 8.8             | 7.4                           | 12.9                        |
| ZnFe <sub>2</sub> O <sub>4</sub>       | 41.3                      | 8.1         | 33.3                | 52.0             | 14.7            | 25.4                          | 38.1                        |
| Na-ZnFe <sub>2</sub> O <sub>4</sub>    | 46.7                      | 9.2         | 15.0                | 51.0             | 34.0            | 68.0                          | 80.0                        |
| K-ZnFe <sub>2</sub> O <sub>4</sub>     | 47.1                      | 8.7         | 14.8                | 39.1             | 46.1            | 68.9                          | 83.6                        |
| K-Zn(FeCo) <sub>2</sub> O <sub>4</sub> | 60.4                      | 4.5         | 28.0                | 51.3             | 20.7            | 57.5                          | 80.0                        |

<sup>a</sup>Reaction conditions: 320 °C, 2.0 MPa, H<sub>2</sub>/CO<sub>2</sub>=2.5, W/F=10 g h<sup>-1</sup> mol<sup>-1</sup>; <sup>b</sup>Alkenes Sel. (%) represents alkene selectivity in whole hydrocarbon; <sup>c</sup>O/(O+P) stands for the molar ratio of C<sub>2+</sub><sup>o</sup>/(C<sub>2+</sub> + C<sub>2+</sub><sup>o</sup>).

**Table S2.** Catalytic performance of CO<sub>2</sub> hydrogenation over different catalysts. <sup>a</sup>

| Catalysts                          | CO <sub>2</sub> Conv. (%) | CO Sel. (%) | Selectivity (mol-%) |                  |                 | Alkenes Sel. (%) <sup>b</sup> | O/(O+P) <sup>c</sup> (%) |
|------------------------------------|---------------------------|-------------|---------------------|------------------|-----------------|-------------------------------|--------------------------|
|                                    |                           |             | CH <sub>4</sub>     | C <sub>2-4</sub> | C <sub>5+</sub> |                               |                          |
| ZnFe <sub>2</sub> O <sub>4</sub>   | 41.3                      | 8.1         | 33.3                | 52.0             | 14.7            | 25.4                          | 38.1                     |
| ZnO+Fe <sub>2</sub> O <sub>3</sub> | 37.9                      | 13.4        | 46.3                | 46.8             | 6.9             | 2.0                           | 3.7                      |

<sup>a</sup>Reaction conditions: 320 °C, 2.0 MPa, H<sub>2</sub>/CO<sub>2</sub>=2.5, W/F=10 g h<sup>-1</sup> mol<sup>-1</sup>; <sup>b</sup>Alkenes Sel. (%) represents alkene selectivity in whole hydrocarbon; <sup>c</sup>O/(O+P) stands for the molar ratio of C<sub>2+=</sub>/(C<sub>2+</sub> + C<sub>2+=</sub>).

**Table S3.** Surface area of different iron-based catalysts.

| Samples                                | Surface area (m <sup>2</sup> /g) |
|----------------------------------------|----------------------------------|
| Fe <sub>2</sub> O <sub>3</sub>         | 15.4                             |
| ZnFe <sub>2</sub> O <sub>4</sub>       | 38.3                             |
| Na-ZnFe <sub>2</sub> O <sub>4</sub>    | 138.1                            |
| K-ZnFe <sub>2</sub> O <sub>4</sub>     | 119.3                            |
| K-Zn(FeCo) <sub>2</sub> O <sub>4</sub> | 139.2                            |

**Table S4.** Catalytic performance of CO<sub>2</sub> hydrogenation over a multi-stage reactor system.

| Catalysts                          | Stage | W/F<br>(g h <sup>-1</sup> mol <sup>-1</sup> ) | T (°C) | P (MPa) | CO <sub>2</sub> Conv.<br>(%) | CO Sel. (%) | Selectivity (mol-%) |                  |                 | STY (g/kg <sub>cat</sub> h) |                             |
|------------------------------------|-------|-----------------------------------------------|--------|---------|------------------------------|-------------|---------------------|------------------|-----------------|-----------------------------|-----------------------------|
|                                    |       |                                               |        |         |                              |             | CH <sub>4</sub>     | C <sub>2-4</sub> | C <sub>5+</sub> | C <sub>5+</sub>             | C <sub>2+<sup>≠</sup></sub> |
| K-ZnFe <sub>2</sub> O <sub>4</sub> | 2     | 2.5                                           | 320    | 2.0     | 55.9                         | 6.4         | 16.5                | 43.8             | 39.7            | 334.9                       | 598.6                       |
| K-ZnFe <sub>2</sub> O <sub>4</sub> | 2     | 2.5                                           | 320    | 2.0     | 55.9                         | 6.4         | 16.5                | 43.8             | 39.7            | 334.9                       | 598.6                       |
| K-ZnFe <sub>2</sub> O <sub>4</sub> | 2     | 2.0                                           | 320    | 2.0     | 50.6                         | 9.9         | 17.4                | 43.4             | 39.2            | 353.0                       | 619.0                       |
| K-ZnFe <sub>2</sub> O <sub>4</sub> | 2     | 2.0                                           | 340    | 2.0     | 60.0                         | 5.6         | 16.7                | 40.6             | 42.7            | 487.6                       | 797.5                       |
| K-ZnFe <sub>2</sub> O <sub>4</sub> | 2     | 2.0                                           | 360    | 2.0     | 66.1                         | 5.8         | 24.4                | 42.7             | 32.9            | 412.1                       | 799.1                       |
| K-ZnFe <sub>2</sub> O <sub>4</sub> | 3     | 2.0                                           | 320    | 2.0     | 66.3                         | 4.0         | 13.5                | 37.1             | 49.4            | 632.7                       | 923.1                       |
| K-ZnFe <sub>2</sub> O <sub>4</sub> | 3     | 2.0                                           | 340    | 2.0     | 76.7                         | 2.3         | 13.5                | 33.5             | 53.0            | 787.4                       | 1086.8                      |

Notes: Stage 2 stands for a two-stage reactor system while stage 3 stands for a three-stage reactor system.

**Table S5.** Catalytic performance of CO<sub>2</sub> hydrogenation over different catalysts.

| Catalysts                       | Stage | GHSV<br>(mL h <sup>-1</sup> g <sub>cat</sub> <sup>-1</sup> ) | T (°C) | P (MPa) | CO <sub>2</sub> Conv.<br>(%) | CO Sel. (%) | Selectivity (mol-%) |                   |                 | STY (g/kg <sub>cat</sub> h) |                             |
|---------------------------------|-------|--------------------------------------------------------------|--------|---------|------------------------------|-------------|---------------------|-------------------|-----------------|-----------------------------|-----------------------------|
|                                 |       |                                                              |        |         |                              |             | CH <sub>4</sub>     | C <sub>2-4</sub>  | C <sub>5+</sub> | C <sub>5+</sub>             | C <sub>2+<sup>a</sup></sub> |
| Wei et al. <sup>1</sup>         | 1     | 4000                                                         | 320    | 3.0     | 34.0                         | 14.0        | 8.0                 | 18.0              | 74.0            | 145.0                       | 180.0 <sup>a</sup>          |
| Gao et al. <sup>2</sup>         | 1     | 9000                                                         | 340    | 3.0     | 19.0                         | 48.0        | 1.0                 | 27.6              | 71.4            | 106.4                       | 147.6 <sup>b</sup>          |
| Gnanamani et al. <sup>3</sup>   | 1     | 2000                                                         | 270    | 0.9     | 22.6                         | 53.0        | 65.5                | 25.1              | 9.4             | 3.5                         | 12.9 <sup>c</sup>           |
| Wei et al. <sup>4</sup>         | 1     | 2000                                                         | 320    | 3.0     | 40.5                         | 13.5        | 15.8                | 54.1              | 30.1            | 31.4                        | 87.8 <sup>d</sup>           |
| Choi et al. <sup>5</sup>        | 1     | 1800                                                         | 300    | 1.0     | 18.1                         | 31.9        | 3.9                 | 35.8              | 60.3            | 20.8                        | 33.1 <sup>e</sup>           |
| Choi et al. <sup>6</sup>        | 1     | 1800                                                         | 340    | 1.0     | 27.8                         | 21.9        | 9.7                 | 31.8              | 58.5            | 35.5                        | 50.3                        |
| Gao et al. <sup>7</sup>         | 1     | 12000                                                        | 400    | 1.5     | 13.0                         | 84.0        | 2.0                 | 98.0              | 0.0             | 0                           | 38.0                        |
| Gao et al. <sup>8</sup>         | 1     | 15750                                                        | 400    | 3.0     | 34.0                         | 83.0        | 5.0                 | 93.0              | 2.0             | 2.7                         | 131.6 <sup>f</sup>          |
| Li et al. <sup>9</sup>          | 1     | 3600                                                         | 380    | 2.0     | 47.0                         | 12.0        | 3.0                 | 95.0              | 2.0             | 4.4                         | 181.9                       |
| Liu et al. <sup>10</sup>        | 1     | 3600                                                         | 400    | 3.0     | 46.1                         | 17.5        | 32.3                | 26.9              | 40.8            | 83.2                        | 138.1 <sup>g</sup>          |
| Visconti et al. <sup>11</sup>   | 1     | 4100                                                         | 300    | 0.5     | 45.0                         | 12.0        | 18.2                | 81.8 <sup>h</sup> | N.G.            | N.G.                        | 205.1 <sup>i</sup>          |
| Liang et al. <sup>12</sup>      | 1     | 2040                                                         | 320    | 3.0     | 39.3                         | 9.0         | 8.9                 | 31.2              | 59.9            | 67.8                        | 92.0                        |
| Li et al. <sup>13</sup>         | 1     | 3600                                                         | 400    | 3.0     | 41.7                         | 26.5        | 37.8                | 43.4              | 18.8            | 32.3                        | 106.5 <sup>j</sup>          |
| Boreriboon et al. <sup>14</sup> | 1     | 3600                                                         | 300    | 1.1     | 23.9                         | 31.0        | 33.3                | 16.0              | 50.7            | 44.9                        | 59.0 <sup>k</sup>           |
| Kishan et al. <sup>15</sup>     | 1     | 1900                                                         | 300    | 1.0     | 27.5                         | 18.6        | 28.2                | 46.3              | 25.5            | 18.2                        | 51.2 <sup>l</sup>           |
| Nam et al. <sup>16</sup>        | 1     | 1900                                                         | 300    | 1.0     | 26.5                         | 4.4         | 24.3                | 58.4              | 17.3            | 12.9                        | 56.4 <sup>m</sup>           |
| Guo et al. <sup>17</sup>        | 2     | 9200                                                         | 300    | 3.0     | 65.1                         | 3.3         | 21.0                | 40.4              | 38.5            | 227.4                       | 466.6 <sup>n</sup>          |
| <b>Our work</b>                 | 3     | 12000                                                        | 340    | 2.0     | 76.7                         | 2.3         | 13.5                | 33.5              | 53.0            | 787.4                       | 1086.8                      |
| <b>Our work</b>                 | 3     | 24000                                                        | 340    | 2.0     | 70.8                         | 3.7         | 19.2                | 44.5              | 36.3            | 1000.5                      | 1858.1                      |

Notes: a. C<sub>2+</sub> products; b. C<sub>2+</sub> products; c. C<sub>2+</sub> products; d. C<sub>2+</sub> products; e. C<sub>2+</sub> products; f. C<sub>2+</sub> products; g. C<sub>2+</sub> products; h. C<sub>2+</sub> products; i. C<sub>2+</sub> products; j. C<sub>2+</sub> products; k. C<sub>2+</sub> products; l. C<sub>2+</sub> products; m. C<sub>2+</sub> products; n. C<sub>2+</sub> products.

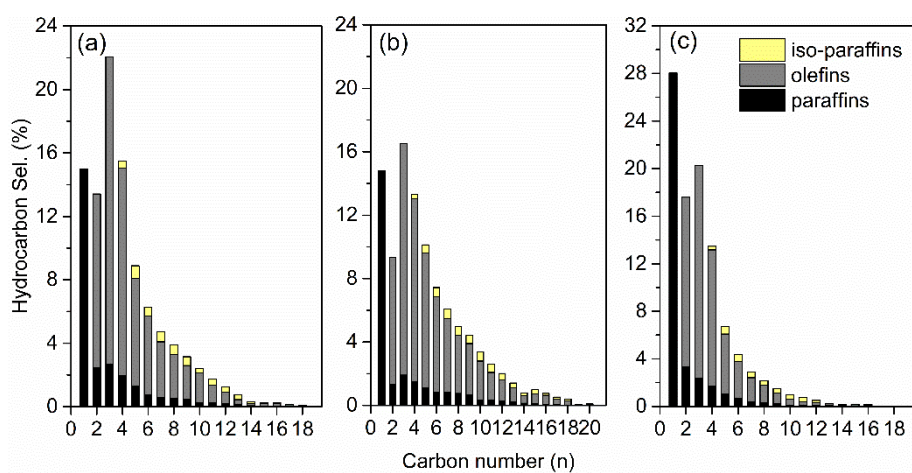

**Fig. S1.** Product distribution from different spent iron-based catalysts. (a, Na-ZnFe<sub>2</sub>O<sub>4</sub>; b, K-ZnFe<sub>2</sub>O<sub>4</sub>; c, K-Zn(FeCo)<sub>2</sub>O<sub>4</sub>)



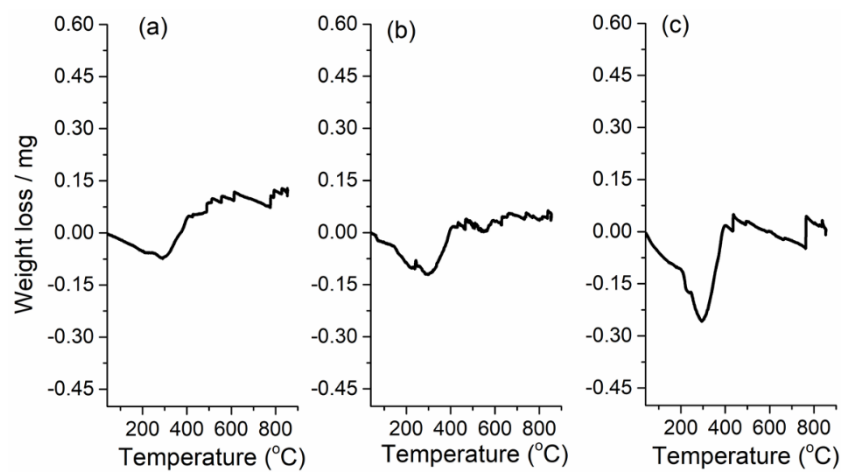

**Fig. S2.** Weight loss of different iron-based catalysts after 36h reaction with an  $N_2/O_2 = 4$ . (a, Na-ZnFe<sub>2</sub>O<sub>4</sub>; b, K-ZnFe<sub>2</sub>O<sub>4</sub>; c, K-Zn(FeCo)<sub>2</sub>O<sub>4</sub>, data collected from TG profiles)

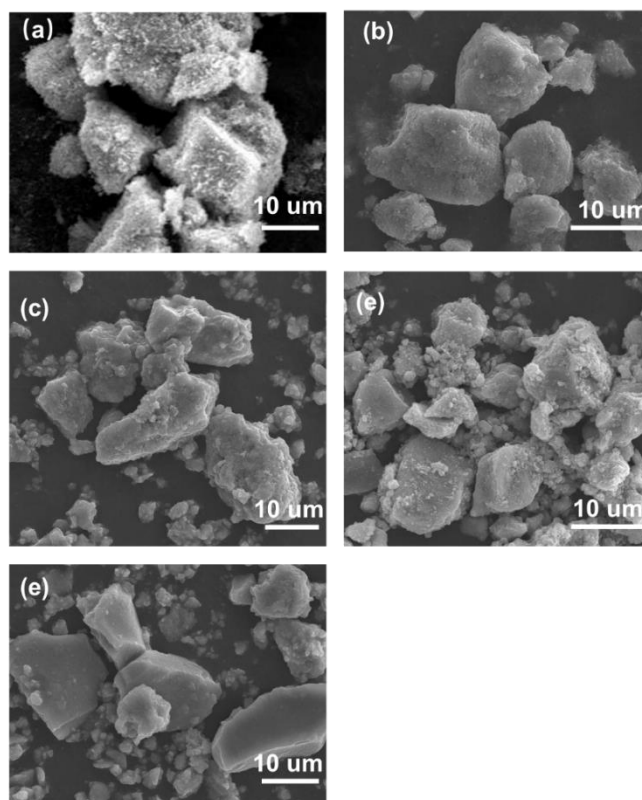

**Fig. S3.** Typical SEM images of different as-prepared iron-based catalysts. (a, Fe<sub>2</sub>O<sub>3</sub>; b, ZnFe<sub>2</sub>O<sub>4</sub>; c, Na-ZnFe<sub>2</sub>O<sub>4</sub>; d, K-ZnFe<sub>2</sub>O<sub>4</sub>; e, K-Zn(FeCo)<sub>2</sub>O<sub>4</sub>)

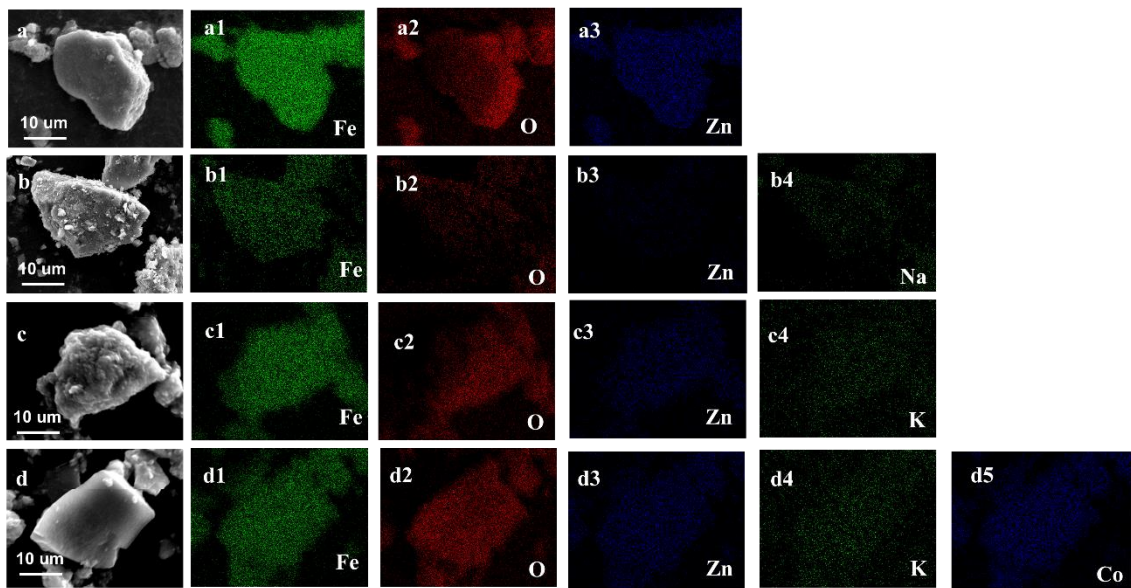

**Fig. S4.** Special SEM images and corresponding element composition mapping of different spinel-like catalysts. (a, ZnFe<sub>2</sub>O<sub>4</sub>; b, Na-ZnFe<sub>2</sub>O<sub>4</sub>; c, K-ZnFe<sub>2</sub>O<sub>4</sub>; d, K-Zn(FeCo)<sub>2</sub>O<sub>4</sub>)

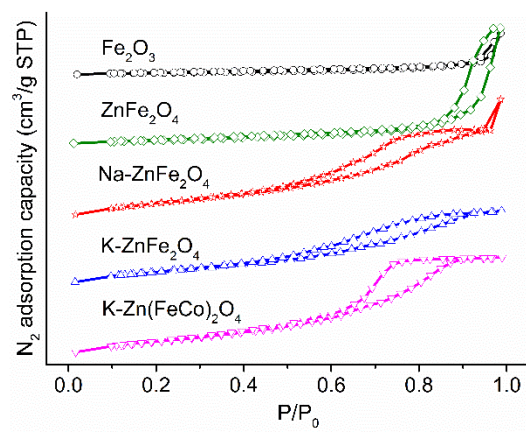

**Fig. S5.** N<sub>2</sub> adsorption-desorption isotherms of different iron-based catalysts.

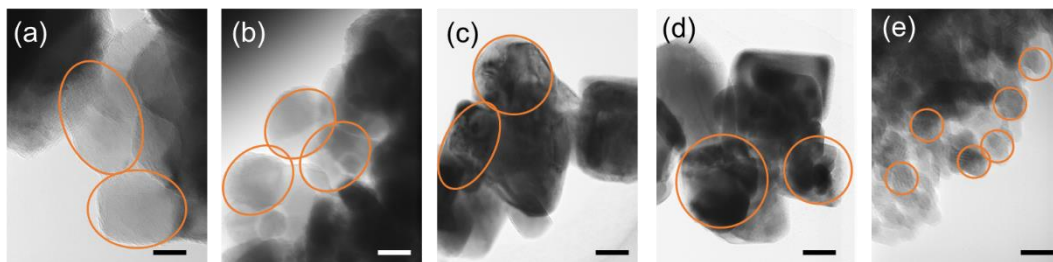

**Fig. S6.** Typical TEM images of different spent catalysts. (a. Fe<sub>2</sub>O<sub>3</sub>; b. ZnFe<sub>2</sub>O<sub>4</sub>; c. Na-ZnFe<sub>2</sub>O<sub>4</sub>; d. Na-ZnFe<sub>2</sub>O<sub>4</sub>; e. K-Zn(FeCo)<sub>2</sub>O<sub>4</sub>; besides, the stand bars in the pictures stand for 10 nm) The orange circles that marked in figures stand for the particle sizes of different spent catalysts.

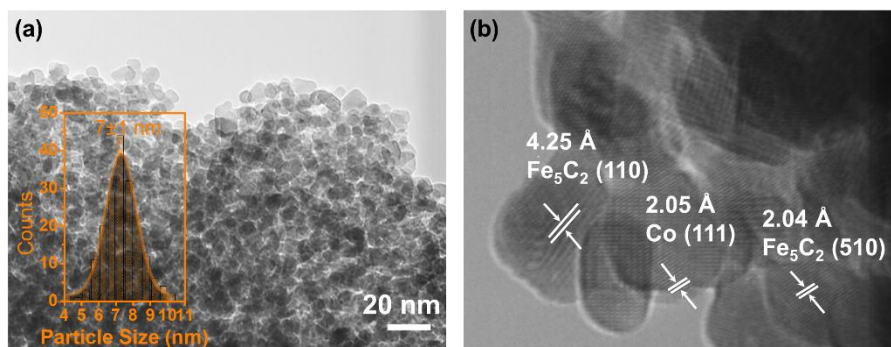

**Fig. S7.** Typical TEM images of spent K-Zn(FeCo)<sub>2</sub>O<sub>4</sub>.

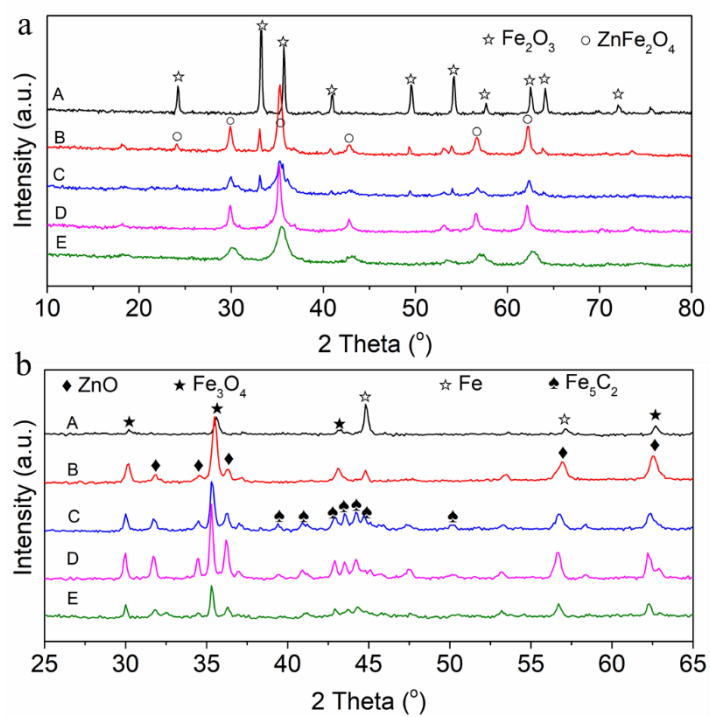

**Fig. S8.** XRD patterns of fresh (a) and spent (b) catalysts. (A,  $\text{Fe}_2\text{O}_3$ ; B,  $\text{ZnFe}_2\text{O}_4$ ; C, Na- $\text{ZnFe}_2\text{O}_4$ ; D, K- $\text{ZnFe}_2\text{O}_4$ ; E, K-Zn( $\text{FeCo}$ ) $_2\text{O}_4$ )

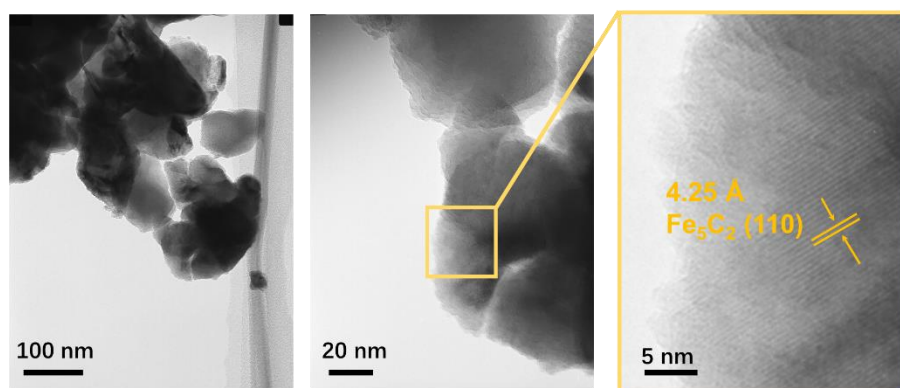

**Fig. S9.** HR-TEM images of spent  $\text{Fe}_2\text{O}_3$  catalysts.



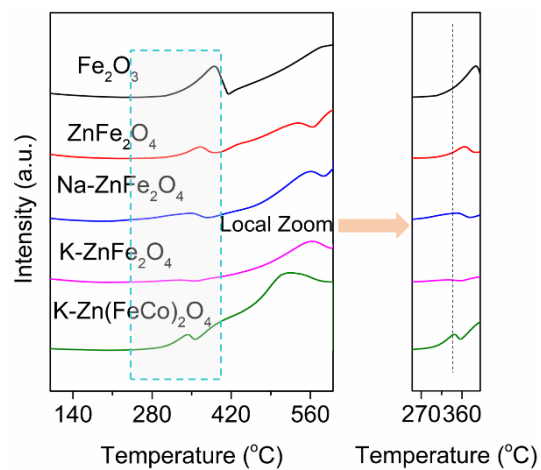

**Fig. S10.** H<sub>2</sub>-TPR curves of different catalysts.

Usually, the reduction of a catalyst can be regarded as the first step of a phase composition change, followed by further generation of active sites. Hence, the H<sub>2</sub>-TPR patterns of different catalysts are compared and shown in Fig. S10. Compared with Fe<sub>2</sub>O<sub>3</sub>, both ZnFe<sub>2</sub>O<sub>4</sub> and Na-ZnFe<sub>2</sub>O<sub>4</sub> show a slight shift to the low temperature (LT) region. However, for the K-Zn(FeCo)<sub>2</sub>O<sub>4</sub> catalyst, the two peaks obviously shift toward the LT region, which indicates that the further doping of Co metal results in a favorable reduction behavior.

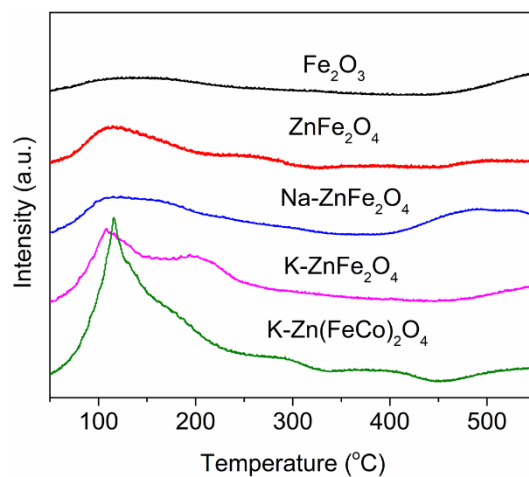

**Fig. S11.** CO<sub>2</sub>-TPD curves of different catalysts.

The desorption experiment of CO<sub>2</sub> (CO<sub>2</sub>-TPD) was carried out and the results are shown in Fig. S11 and S12. According to Fig. S11, it can be found that the absorption amount of CO<sub>2</sub>, from both weak adsorption and medium-strength adsorption, is evidently enhanced with the introduction of the Zn structural promoter. With the further introduction of the electronic promoter, the adsorption strength of CO<sub>2</sub> is well regulated. However, when cobalt metal is introduced into the catalyst system, CO<sub>2</sub> adsorption capacity increases obviously (Fig. S11).

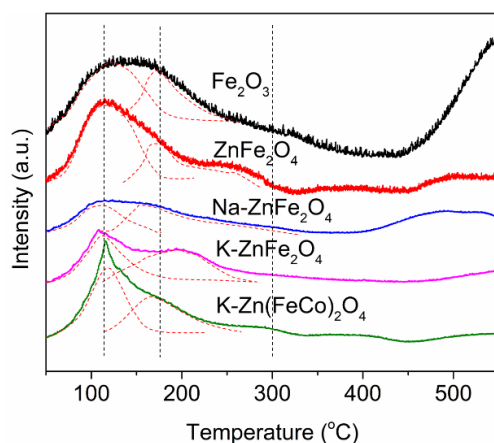

**Fig. S12.** CO<sub>2</sub>-TPD curves normalized by relative surface area content of different catalysts.

To take the surface area into account, the CO<sub>2</sub>-TPD curves normalized by relative surface area are shown in Fig. S12. Compared to the Fe<sub>2</sub>O<sub>3</sub> catalyst, for the ZnFe<sub>2</sub>O<sub>4</sub> catalyst, the content of the medium strength adsorption peak located in the range of 150 to 300 °C is improved compared with that of the weak adsorption peak (50 to 150 °C). In the presence of an electronic promoter, especially K, the adsorption peak of medium strength is strengthened obviously. However, weak CO<sub>2</sub> adsorption is not conducive to the activation and utilization of reactive molecules; hence, this improved adsorption can drive the improvement of activity and target alkene. Besides, the K-Zn(FeCo)<sub>2</sub>O<sub>4</sub> catalyst also still maintains a high relative adsorption content, i.e. a strong medium strength adsorption peak.

## Reference

1. J. Wei, Q. Ge, R. Yao, Z. Wen, C. Fang, L. Guo, H. Xu, J. Sun, *Nat. Commun.*, 2017, 8, 15174-15181.
2. P. Gao, S. Li, X. Bu, S. Dang, Z. Liu, H. Wang, L. Zhong, M. Qiu, C. Yang, J. Cai, W. Wei, Y. Sun, *Nat. Chem.*, 2017, 9, 1019-1024.
3. M.K. Gnanamani, G. Jacobs, H.H. Hamdeh, W.D. Shafer, F. Liu, S.D. Hopps, G.A. Thomas, B.H. Davis, *ACS Catal.*, 2016, 6, 913-927.
4. J. Wei, J. Sun, Z. Wen, C. Fang, Q. Ge, H. Xu, *Catal. Sci. Technol.*, 2016, 6, 4786-4793.
5. Y.H. Choi, Y.J. Jang, H. Park, W.Y. Kim, Y.H. Lee, S.H. Choi, J.S. Lee, *Appl. Catal., B*, 2017, 202, 605-610.
6. Y.H. Choi, E.C. Ra, E.H. Kim, K.Y. Kim, Y.J. Jang, K.-N. Kang, S.H. Choi, J.-H. Jang, J.S. Lee, *ChemSusChem*, 2017, 10, 4764 -4770.
7. J. Gao, C. Jia, B. Liu, *Catal. Sci. Technol.*, 2017, 7, 5602-5607.
8. P. Gao, S. Dang, S. Li, X. Bu, Z. Liu, M. Qiu, C. Yang, H. Wang, L. Zhong, Y. Han, Q. Liu, W. Wei, Y. Sun, *ACS Catal.*, 2017, 8, 571-578.
9. Z. Li, J. Wang, Y. Qu, H. Liu, C. Tang, S. Miao, Z. Feng, H. An, C. Li, *ACS Catal.*, 2017, 7, 8544-8548.
10. J. Liu, A. Zhang, S.H. Min Liua, F. Ding, C. Song, X. Guo, *J CO2 Util.*, 2017, 21, 100-107.
11. C.G. Visconti, M. Martinelli, L. Falbo, A. Infantes-Molina, L. Lietti, P. Forzatti, G. Iaquaniello, E. Palo, B. Picutti, F. Brignoli, *Appl. Catal., B*, 2017, 200, 530-542.
12. B. Liang, T. Sun, J. Ma, H. Duan, L. Li, X. Yang, Y. Zhang, X. Su, Y. Huang, T. Zhang, *Catal. Sci. Technol.*, 2019, 9, 456-464.
13. J. Liu, A. Zhang, X. Jiang, M. Liu, Y. Sun, C. Song, X. Guo, *ACS Sustainable Chem. Eng.*, 2018, 6, 10182-10190.
14. N. Boreriboon, X. Jiang, C. Song, P. Prasassarakich, *J CO2 Util.*, 2018, 25, 330-337.
15. G. Kishan, M.-W. Lee, S.-S. Nam, M.-J. Choi, K.-W. Lee, *Catal. Lett.*, 1998, 56, 215-219.
16. S.-S. Nam, S.-J. Lee, H. Kim, K.-W. Jun, M.-J. Choi, K.-W. Lee, *Energy Convers. Mgmt.*, 1997, 38, 397-402.
17. L. Guo, Y. Cui, P. Zhang, X. Peng, Y. Yoneyama, G. Yang, N. Tsubaki, *ChemistrySelect*, 2018, 3, 13705-13711.
